# Supplementary material for: Prion-like Domains in Eukaryotic Viruses
Source: PubMed Central journal article supplement (PMC5997743; doi:10.1038/s41598-018-27256-w), 2018-06-12
Supplement: 41598_2018_27256_MOESM2_ESM.pdf [file 41598_2018_27256_MOESM2_ESM.pdf]

## Prion-like Domains in Eukaryotic Viruses

George Tetz, Victor Tetz

**Supplementary Table 2.** Summary of the LLR score of prion predictions across viral orders.

| virus_order            | N Obs | Mean  | Std Dev | Minimum | Maximum | Median | Dunn test     |             |                 |                |             |
|------------------------|-------|-------|---------|---------|---------|--------|---------------|-------------|-----------------|----------------|-------------|
|                        |       |       |         |         |         |        | Herpesvirales | Megavirales | Mononegavirales | Picornavirales | Tymovirales |
| <i>Herpesvirales</i>   | 500   | 6.74  | 7.73    | 0.02    | 63.80   | 4.24   |               |             |                 |                |             |
| <i>Megavirales</i>     | 694   | 10.35 | 11.27   | 0.02    | 74.68   | 6.42   | <.0001        |             |                 |                |             |
| <i>Mononegavirales</i> | 75    | 3.93  | 5.66    | 0.16    | 41.38   | 2.39   | 0.0109        | <0.0001     |                 |                |             |
| <i>Nidovirales</i>     | 114   | 7.92  | 9.14    | 0.07    | 42.95   | 5.06   | 0.8978        | 0.1157      | 0.0059          |                |             |
| <i>Picornavirales</i>  | 60    | 5.98  | 5.71    | 0.10    | 26.98   | 3.53   | 1             | 0.0406      | 0.2115          | 0.9579         |             |
| <i>Tymovirales</i>     | 23    | 6.43  | 5.17    | 0.07    | 16.83   | 5.91   | 0.9944        | 0.8398      | 0.2216          | 1              | 0.9926      |
| Unassigned             | 1204  | 6.91  | 8.03    | 0.00    | 51.14   | 4.11   |               |             |                 |                |             |

Nonparametric analysis of variances  $F_{5,296}=27.63$ ;  $p<.0001$

Pairwise comparison Dunn test
