# Supplementary material for: Prion-like Domains in Eukaryotic Viruses
Source: PubMed Central journal article supplement (PMC5997743; doi:10.1038/s41598-018-27256-w), 2018-06-12
Supplement: 41598_2018_27256_MOESM3_ESM.pdf [file 41598_2018_27256_MOESM3_ESM.pdf]

## Prion-like Domains in Eukaryotic Viruses

George Tetz, Victor Tetz

**Supplementary Table 3. Mean PrD numbers per species in the same viral order.**

| virus_order     | N Obs | Sum  | Mean | Std Dev | Minimum | Maximum | Median | Dunn test     |             |                 |             |                |
|-----------------|-------|------|------|---------|---------|---------|--------|---------------|-------------|-----------------|-------------|----------------|
|                 |       |      |      |         |         |         |        | Herpesvirales | Megavirales | Mononegavirales | Nidovirales | Picornavirales |
| Herpesvirales   | 74    | 500  | 6,85 | 6,68    | 1       | 30      | 4      |               |             |                 |             |                |
| Megavirales     | 78    | 694  | 9,51 | 18,81   | 1       | 124     | 4      | 0,8753        |             |                 |             |                |
| Mononegavirales | 35    | 85   | 2,21 | 2,12    | 1       | 11      | 1      | <.0001        | 0,0003      |                 |             |                |
| Nidovirales     | 60    | 114  | 1,87 | 2       | 1       | 11      | 1      | <.0001        | <.0001      | 0,8166          |             |                |
| Picornavirales  | 44    | 60   | 1,36 | 1,2     | 1       | 7       | 1      | <.0001        | <.0001      | 0,0965          | 0,5452      |                |
| Tymovirales     | 16    | 23   | 1,44 | 0,63    | 1       | 3       | 1      | <.0001        | 0,0002      | 0,9148          | 1           | 0,914          |
| Unassigned      | 427   | 1204 | 2,78 | 3,44    | 1       | 38      | 1      |               |             |                 |             |                |

Nonparametric analysis of variances  $F_{5,296}=27.63$ ;  $p<.0001$

Pairwise comparison Dunn test
