# Supplementary material for: Prion-like Domains in Eukaryotic Viruses
Source: PubMed Central journal article supplement (PMC5997743; doi:10.1038/s41598-018-27256-w), 2018-06-12
Supplement: 41598_2018_27256_MOESM4_ESM.pdf [file 41598_2018_27256_MOESM4_ESM.pdf]

## Prion-like Domains in Eukaryotic Viruses

George Tetz, Victor Tetz

**Supplementary Table 4.** Distribution of viral orders families with the LLR scores higher than 40, 50, and 60.

| Table of virus_order by LLR_cod |                  |         |       |       |       |     |       |
|---------------------------------|------------------|---------|-------|-------|-------|-----|-------|
| virus_order                     |                  | LLR_cod |       |       |       |     | Total |
|                                 |                  | <30     | >30   | >40   | >50   | >60 |       |
| Herpesvirales                   | Frequency        | 491     | 6     | 2     | 0     | 1   | 500   |
|                                 | Col Pct          | 19.07   | 9.38  | 7.69  | 0     | 50  |       |
| Megavirales                     | Frequency        | 638     | 29    | 10    | 9     | 1   | 687   |
|                                 | Col Pct          | 24.78   | 45.31 | 38.46 | 69.23 | 50  |       |
| Mononegavirales                 | Frequency        | 84      | 0     | 1     | 0     | 0   | 85    |
|                                 | Col Pct          | 3.26    | 0     | 3.85  | 0     | 0   |       |
| Nidovirales                     | Frequency        | 107     | 5     | 1     | 0     | 0   | 113   |
|                                 | Col Pct          | 4.16    | 7.81  | 3.85  | 0     | 0   |       |
| Picornavirales                  | Frequency        | 60      | 0     | 0     | 0     | 0   | 60    |
|                                 | Col Pct          | 2.33    | 0     | 0     | 0     | 0   |       |
| Tymovirales                     | Frequency        | 23      | 0     | 0     | 0     | 0   | 23    |
|                                 | Col Pct          | 0.89    | 0     | 0     | 0     | 0   |       |
| undef                           | Frequency        | 1172    | 24    | 12    | 4     | 0   | 1212  |
|                                 | Col Pct          | 45.51   | 37.5  | 46.15 | 30.77 | 0   |       |
| <b>Total</b>                    | <b>Frequency</b> | 2574    | 64    | 26    | 13    | 2   | 2679  |
