# Supplementary material for: Prion-like Domains in Eukaryotic Viruses
Source: PubMed Central journal article supplement (PMC5997743; doi:10.1038/s41598-018-27256-w), 2018-06-12
Supplement: 41598_2018_27256_MOESM5_ESM.pdf [file 41598_2018_27256_MOESM5_ESM.pdf]

## Prion-like Domains in Eukaryotic Viruses

George Tetz, Victor Tetz

**Supplementary Table 5.** Distribution of viral families with the LLR scores higher than 40, 50, and 60.

| Table of virus_family by LLR_cod |           |         |       |       |     |     |       |
|----------------------------------|-----------|---------|-------|-------|-----|-----|-------|
| virus_family                     |           | LLR_cod |       |       |     |     | Total |
|                                  |           | <30     | >30   | >40   | >50 | >60 |       |
| Adenoviridae                     | Frequency | 80      | 0     | 0     | 0   | 0   | 80    |
|                                  | Col Pct   | 3.11    | 0     | 0     | 0   | 0   |       |
| Alloherpesviridae                | Frequency | 54      | 2     | 1     | 0   | 0   | 57    |
|                                  | Col Pct   | 2.1     | 3.13  | 3.85  | 0   | 0   |       |
| Alphaflexiviridae                | Frequency | 15      | 0     | 0     | 0   | 0   | 15    |
|                                  | Col Pct   | 0.58    | 0     | 0     | 0   | 0   |       |
| Anelloviridae                    | Frequency | 11      | 0     | 0     | 0   | 0   | 11    |
|                                  | Col Pct   | 0.43    | 0     | 0     | 0   | 0   |       |
| Arenaviridae                     | Frequency | 1       | 0     | 0     | 0   | 0   | 1     |
|                                  | Col Pct   | 0.04    | 0     | 0     | 0   | 0   |       |
| Arteriviridae                    | Frequency | 24      | 0     | 0     | 0   | 0   | 24    |
|                                  | Col Pct   | 0.93    | 0     | 0     | 0   | 0   |       |
| Ascoviridae                      | Frequency | 5       | 1     | 0     | 0   | 0   | 6     |
|                                  | Col Pct   | 0.19    | 1.56  | 0     | 0   | 0   |       |
| Asfarviridae                     | Frequency | 17      | 0     | 0     | 0   | 0   | 17    |
|                                  | Col Pct   | 0.66    | 0     | 0     | 0   | 0   |       |
| Astroviridae                     | Frequency | 13      | 0     | 0     | 0   | 0   | 13    |
|                                  | Col Pct   | 0.5     | 0     | 0     | 0   | 0   |       |
| Baculoviridae                    | Frequency | 385     | 11    | 3     | 0   | 0   | 399   |
|                                  | Col Pct   | 14.95   | 17.19 | 11.54 | 0   | 0   |       |
| Baculoviridae                    | Frequency | 4       | 0     | 0     | 0   | 0   | 4     |
|                                  | Col Pct   | 0.16    | 0     | 0     | 0   | 0   |       |
| Benyviridae                      | Frequency | 7       | 0     | 0     | 0   | 0   | 7     |
|                                  | Col Pct   | 0.27    | 0     | 0     | 0   | 0   |       |
| Betaflexiviridae                 | Frequency | 7       | 0     | 0     | 0   | 0   | 7     |
|                                  | Col Pct   | 0.27    | 0     | 0     | 0   | 0   |       |
| Betaherpesvirinae                | Frequency | 18      | 0     | 0     | 0   | 0   | 18    |
|                                  | Col Pct   | 0.7     | 0     | 0     | 0   | 0   |       |
| Birnaviridae                     | Frequency | 2       | 0     | 0     | 0   | 0   | 2     |
|                                  | Col Pct   | 0.08    | 0     | 0     | 0   | 0   |       |
| Bromoviridae                     | Frequency | 8       | 0     | 0     | 0   | 0   | 8     |
|                                  | Col Pct   | 0.31    | 0     | 0     | 0   | 0   |       |
| Bunyaviridae                     | Frequency | 3       | 0     | 0     | 0   | 0   | 3     |
|                                  | Col Pct   | 0.12    | 0     | 0     | 0   | 0   |       |
| Caliciviridae                    | Frequency | 26      | 0     | 0     | 0   | 0   | 26    |
|                                  | Col Pct   | 1.01    | 0     | 0     | 0   | 0   |       |
| Caulimoviridae                   | Frequency | 20      | 0     | 0     | 0   | 0   | 20    |
|                                  | Col Pct   | 0.78    | 0     | 0     | 0   | 0   |       |
| Chrysoviridae                    | Frequency | 1       | 0     | 0     | 0   | 0   | 1     |
|                                  | Col Pct   | 0.04    | 0     | 0     | 0   | 0   |       |
| Circoviridae                     | Frequency | 9       | 0     | 0     | 0   | 0   | 9     |
|                                  | Col Pct   | 0.35    | 0     | 0     | 0   | 0   |       |
| Closteroviridae                  | Frequency | 6       | 0     | 0     | 0   | 0   | 6     |
|                                  | Col Pct   | 0.23    | 0     | 0     | 0   | 0   |       |

|                     |           |       |       |       |       |    |     |
|---------------------|-----------|-------|-------|-------|-------|----|-----|
| Coronaviridae       | Frequency | 74    | 4     | 1     | 0     | 0  | 79  |
|                     | Col Pct   | 2.87  | 6.25  | 3.85  | 0     | 0  |     |
| Endornaviridae      | Frequency | 3     | 0     | 0     | 0     | 0  | 3   |
|                     | Col Pct   | 0.12  | 0     | 0     | 0     | 0  |     |
| Filoviridae         | Frequency | 23    | 0     | 0     | 0     | 0  | 23  |
|                     | Col Pct   | 0.89  | 0     | 0     | 0     | 0  |     |
| Flaviviridae        | Frequency | 21    | 0     | 0     | 0     | 0  | 21  |
|                     | Col Pct   | 0.82  | 0     | 0     | 0     | 0  |     |
| Geminiviridae       | Frequency | 8     | 0     | 0     | 0     | 0  | 8   |
|                     | Col Pct   | 0.31  | 0     | 0     | 0     | 0  |     |
| Hepadnaviridae      | Frequency | 17    | 0     | 0     | 0     | 0  | 17  |
|                     | Col Pct   | 0.66  | 0     | 0     | 0     | 0  |     |
| Hepeviridae         | Frequency | 2     | 0     | 0     | 0     | 0  | 2   |
|                     | Col Pct   | 0.08  | 0     | 0     | 0     | 0  |     |
| Herpesviridae       | Frequency | 412   | 4     | 1     | 0     | 1  | 418 |
|                     | Col Pct   | 16    | 6.25  | 3.85  | 0     | 50 |     |
| Hytrosaviridae      | Frequency | 10    | 1     | 0     | 0     | 0  | 11  |
|                     | Col Pct   | 0.39  | 1.56  | 0     | 0     | 0  |     |
| Iflaviridae         | Frequency | 3     | 0     | 0     | 0     | 0  | 3   |
|                     | Col Pct   | 0.12  | 0     | 0     | 0     | 0  |     |
| Iridoviridae        | Frequency | 45    | 2     | 3     | 1     | 0  | 51  |
|                     | Col Pct   | 1.75  | 3.13  | 11.54 | 7.69  | 0  |     |
| Luteoviridae        | Frequency | 8     | 0     | 0     | 0     | 0  | 8   |
|                     | Col Pct   | 0.31  | 0     | 0     | 0     | 0  |     |
| Malacoherpesviridae | Frequency | 7     | 0     | 0     | 0     | 0  | 7   |
|                     | Col Pct   | 0.27  | 0     | 0     | 0     | 0  |     |
| Marseilleviridae    | Frequency | 46    | 0     | 0     | 0     | 0  | 46  |
|                     | Col Pct   | 1.79  | 0     | 0     | 0     | 0  |     |
| Mesoniviridae       | Frequency | 9     | 0     | 0     | 0     | 0  | 9   |
|                     | Col Pct   | 0.35  | 0     | 0     | 0     | 0  |     |
| Mimiviridae         | Frequency | 270   | 15    | 8     | 7     | 0  | 300 |
|                     | Col Pct   | 10.49 | 23.44 | 30.77 | 53.85 | 0  |     |
| Nimaviridae         | Frequency | 22    | 0     | 1     | 1     | 0  | 24  |
|                     | Col Pct   | 0.85  | 0     | 3.85  | 7.69  | 0  |     |
| Nodaviridae         | Frequency | 4     | 0     | 0     | 0     | 0  | 4   |
|                     | Col Pct   | 0.16  | 0     | 0     | 0     | 0  |     |
| Nudiviridae         | Frequency | 59    | 8     | 4     | 0     | 0  | 71  |
|                     | Col Pct   | 2.29  | 12.5  | 15.38 | 0     | 0  |     |
| Orthomyxoviridae    | Frequency | 3     | 0     | 0     | 0     | 0  | 3   |
|                     | Col Pct   | 0.12  | 0     | 0     | 0     | 0  |     |
| Papillomaviridae    | Frequency | 37    | 0     | 0     | 0     | 0  | 37  |
|                     | Col Pct   | 1.44  | 0     | 0     | 0     | 0  |     |
| Paramyxoviridae     | Frequency | 55    | 0     | 0     | 0     | 0  | 55  |
|                     | Col Pct   | 2.14  | 0     | 0     | 0     | 0  |     |
| Partitiviridae      | Frequency | 2     | 0     | 0     | 0     | 0  | 2   |
|                     | Col Pct   | 0.08  | 0     | 0     | 0     | 0  |     |
| Parvoviridae        | Frequency | 43    | 0     | 0     | 0     | 0  | 43  |
|                     | Col Pct   | 1.67  | 0     | 0     | 0     | 0  |     |
| Phycodnaviridae     | Frequency | 138   | 8     | 1     | 0     | 0  | 147 |
|                     | Col Pct   | 5.36  | 12.5  | 3.85  | 0     | 0  |     |
| Picobirnaviridae    | Frequency | 1     | 0     | 0     | 0     | 0  | 1   |
|                     | Col Pct   | 0.04  | 0     | 0     | 0     | 0  |     |
| Picornaviridae      | Frequency | 54    | 0     | 0     | 0     | 0  | 54  |
|                     | Col Pct   | 2.1   | 0     | 0     | 0     | 0  |     |
| Polydnaviridae      | Frequency | 24    | 0     | 0     | 0     | 0  | 24  |

|                |                  |      |      |      |       |    |      |
|----------------|------------------|------|------|------|-------|----|------|
|                | Col Pct          | 0.93 | 0    | 0    | 0     | 0  |      |
| Polyomaviridae | Frequency        | 17   | 0    | 0    | 0     | 0  | 17   |
|                | Col Pct          | 0.66 | 0    | 0    | 0     | 0  |      |
| Polyomaviridae | Frequency        | 3    | 0    | 0    | 0     | 0  | 3    |
|                | Col Pct          | 0.12 | 0    | 0    | 0     | 0  |      |
| Potyviridae    | Frequency        | 36   | 2    | 0    | 2     | 0  | 40   |
|                | Col Pct          | 1.4  | 3.13 | 0    | 15.38 | 0  |      |
| Poxviridae     | Frequency        | 220  | 5    | 2    | 2     | 1  | 230  |
|                | Col Pct          | 8.54 | 7.81 | 7.69 | 15.38 | 50 |      |
| Reoviridae     | Frequency        | 44   | 0    | 0    | 0     | 0  | 44   |
|                | Col Pct          | 1.71 | 0    | 0    | 0     | 0  |      |
| Retroviridae   | Frequency        | 87   | 0    | 0    | 0     | 0  | 87   |
|                | Col Pct          | 3.38 | 0    | 0    | 0     | 0  |      |
| Rhabdoviridae  | Frequency        | 6    | 0    | 1    | 0     | 0  | 7    |
|                | Col Pct          | 0.23 | 0    | 3.85 | 0     | 0  |      |
| Secoviridae    | Frequency        | 3    | 0    | 0    | 0     | 0  | 3    |
|                | Col Pct          | 0.12 | 0    | 0    | 0     | 0  |      |
| Togaviridae    | Frequency        | 13   | 0    | 0    | 0     | 0  | 13   |
|                | Col Pct          | 0.5  | 0    | 0    | 0     | 0  |      |
| Tombusviridae  | Frequency        | 3    | 0    | 0    | 0     | 0  | 3    |
|                | Col Pct          | 0.12 | 0    | 0    | 0     | 0  |      |
| Totiviridae    | Frequency        | 6    | 0    | 0    | 0     | 0  | 6    |
|                | Col Pct          | 0.23 | 0    | 0    | 0     | 0  |      |
| Tymoviridae    | Frequency        | 1    | 0    | 0    | 0     | 0  | 1    |
|                | Col Pct          | 0.04 | 0    | 0    | 0     | 0  |      |
| Virgaviridae   | Frequency        | 19   | 0    | 0    | 0     | 0  | 19   |
|                | Col Pct          | 0.74 | 0    | 0    | 0     | 0  |      |
| undef          | Frequency        | 1    | 1    | 0    | 0     | 0  | 2    |
|                | Col Pct          | 0.04 | 1.56 | 0    | 0     | 0  |      |
|                |                  |      |      |      |       |    |      |
| <b>Total</b>   | <b>Frequency</b> | 2574 | 64   | 26   | 13    | 2  | 2679 |
