# Supplementary material for: Prion-like Domains in Eukaryotic Viruses
Source: PubMed Central journal article supplement (PMC5997743; doi:10.1038/s41598-018-27256-w), 2018-06-12

# Prion-like domains in eukaryotic viruses

George Tetz, Victor Tetz

Supplementary Fig 1

Adsorption\_and\_Entry

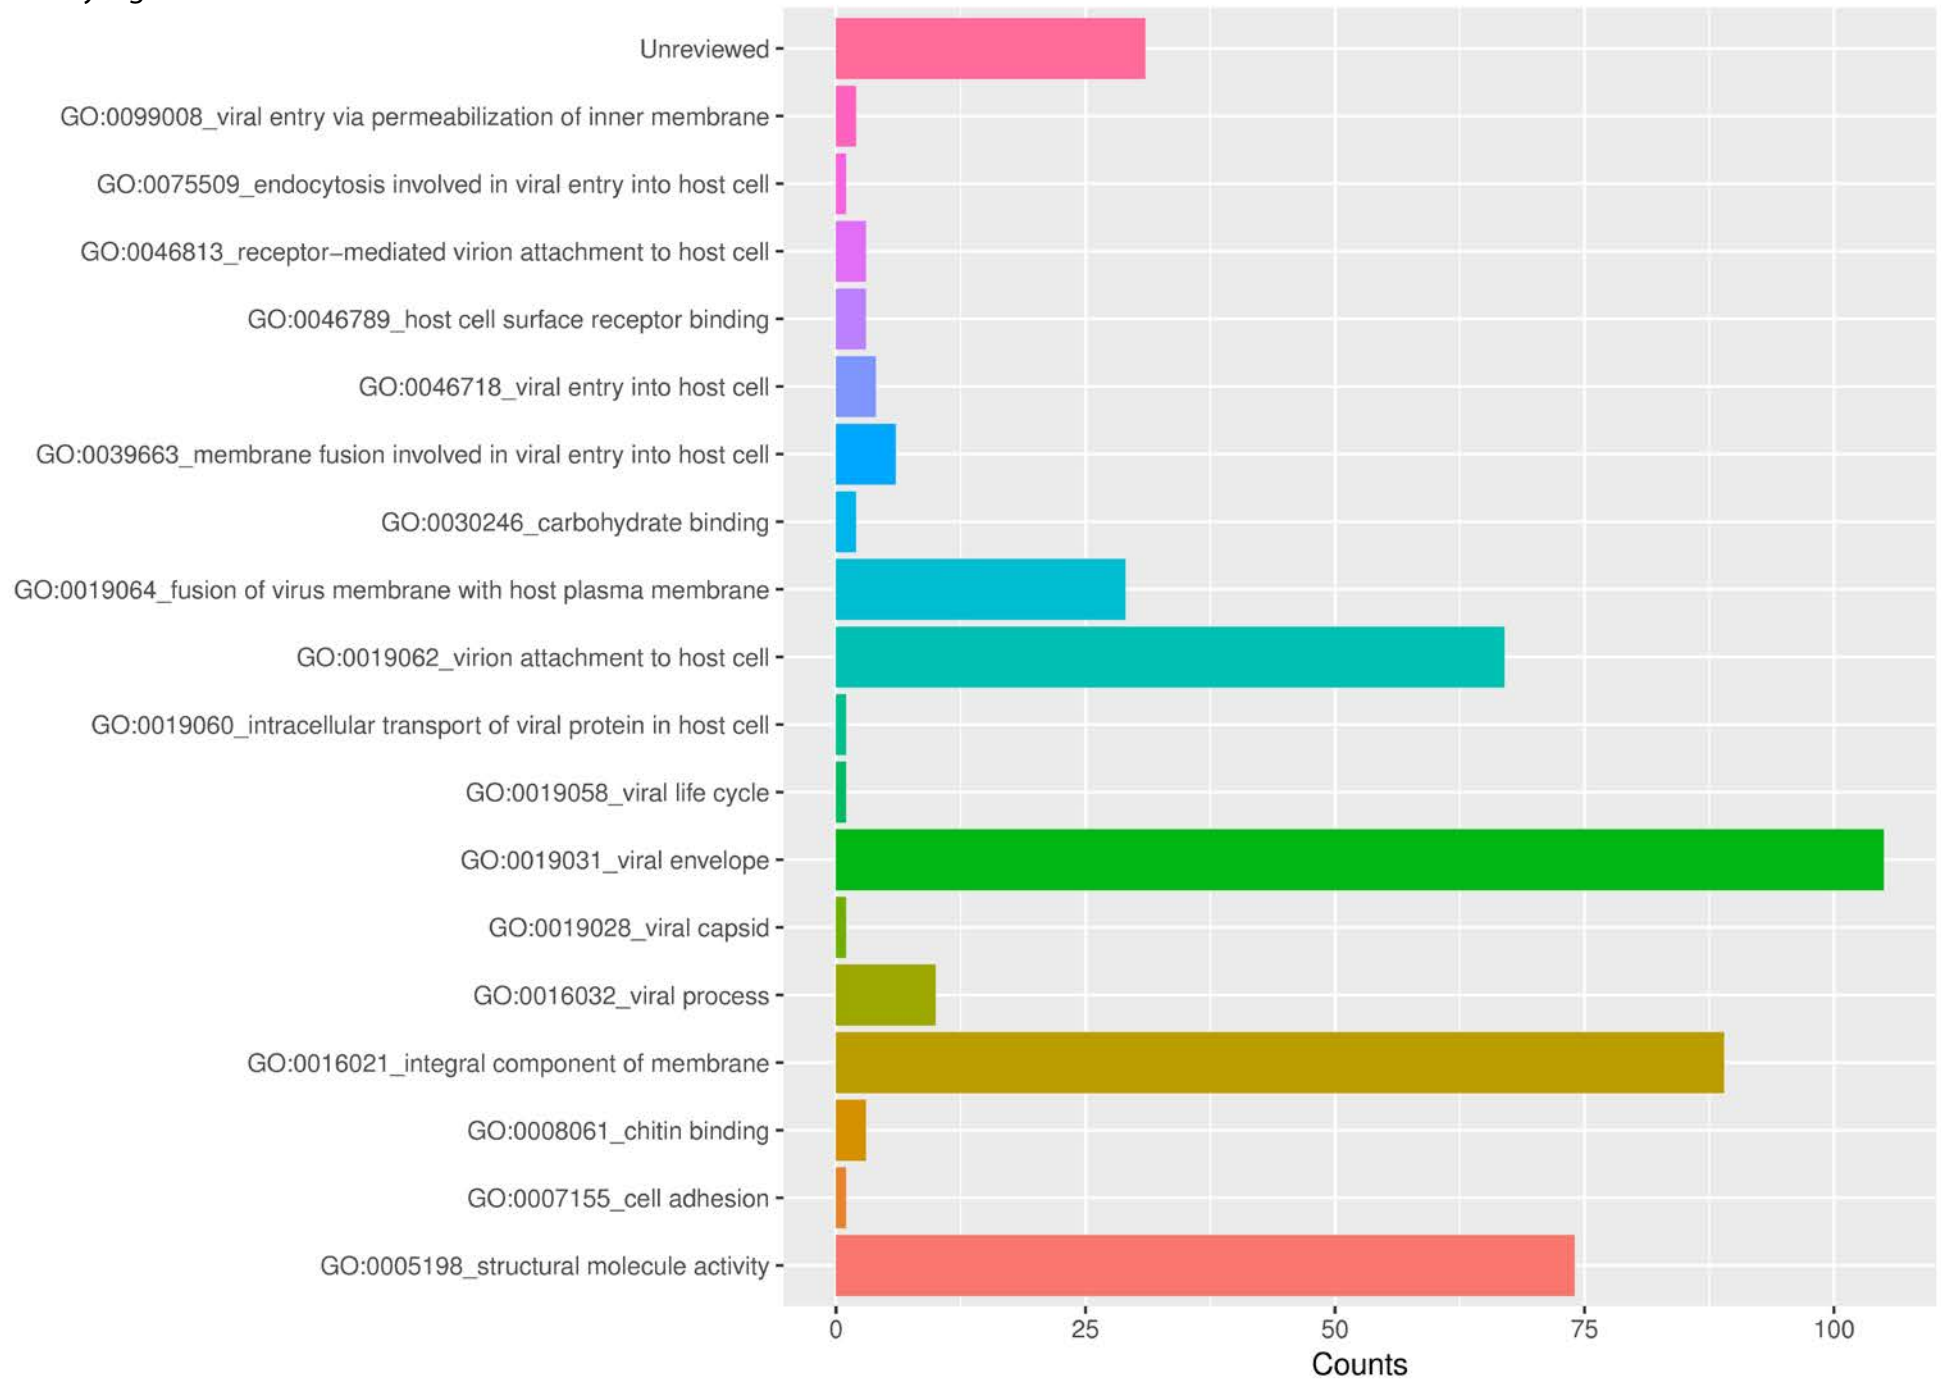

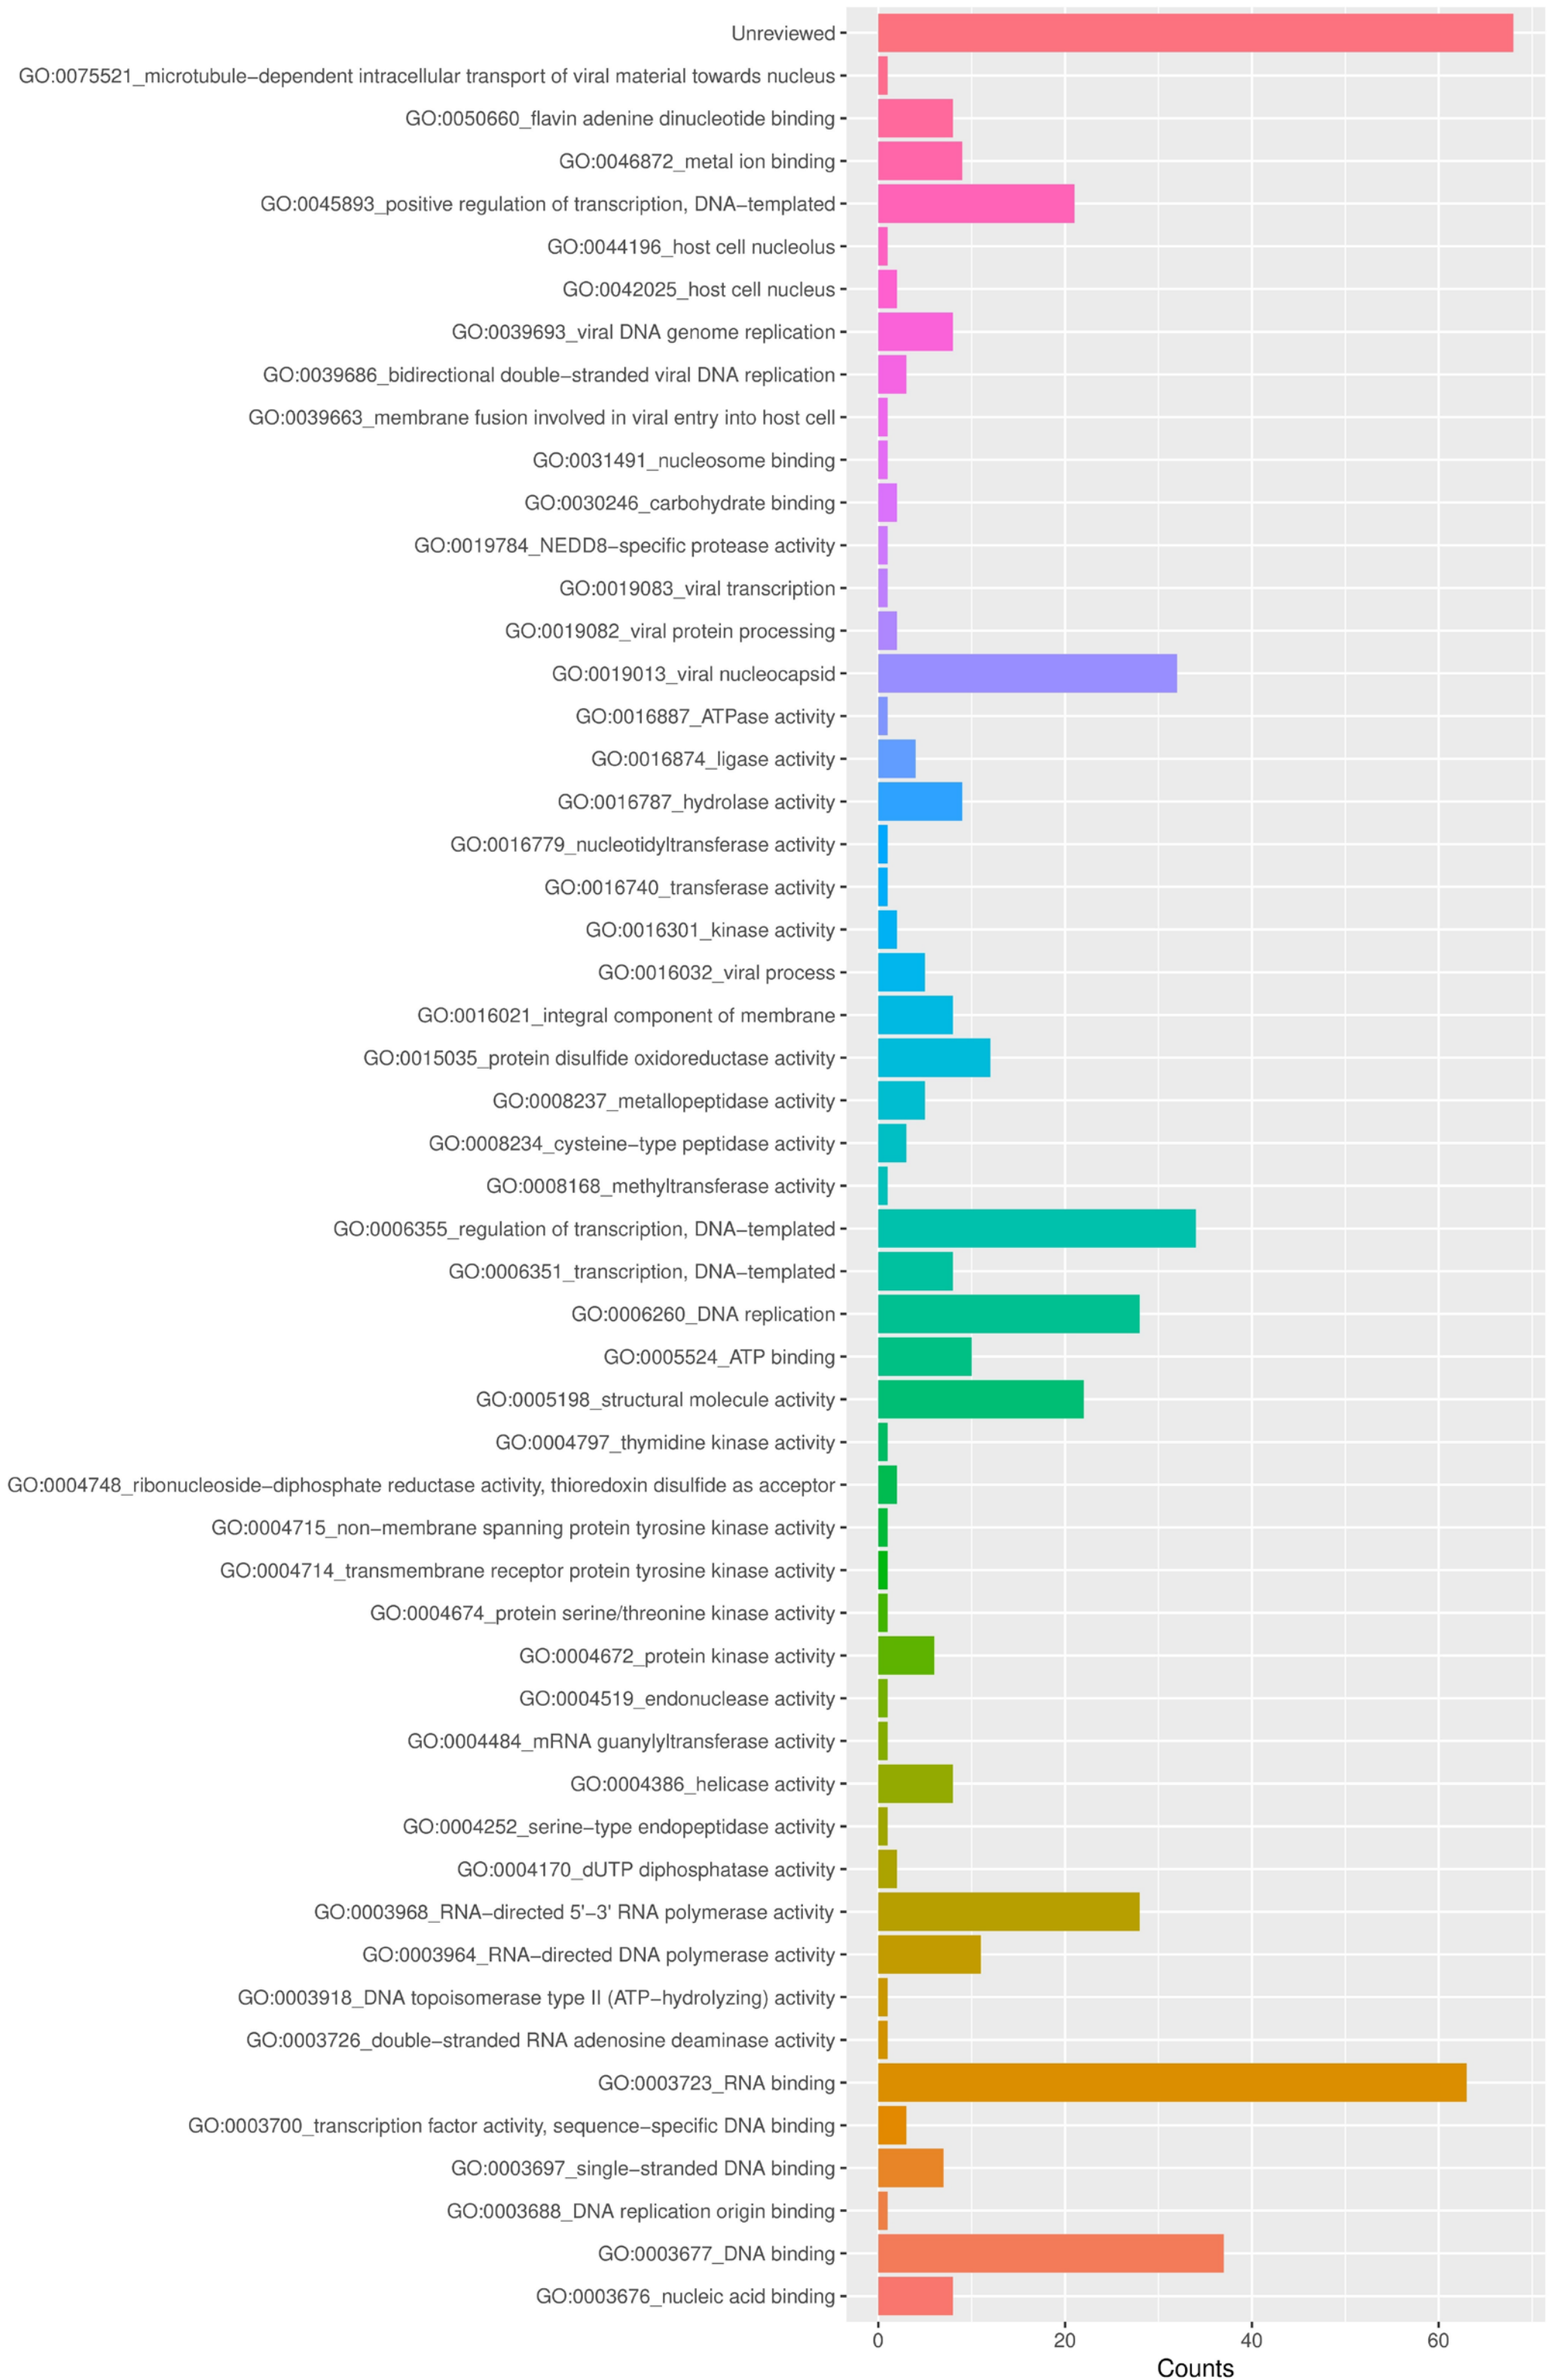

Supplementary Fig 3

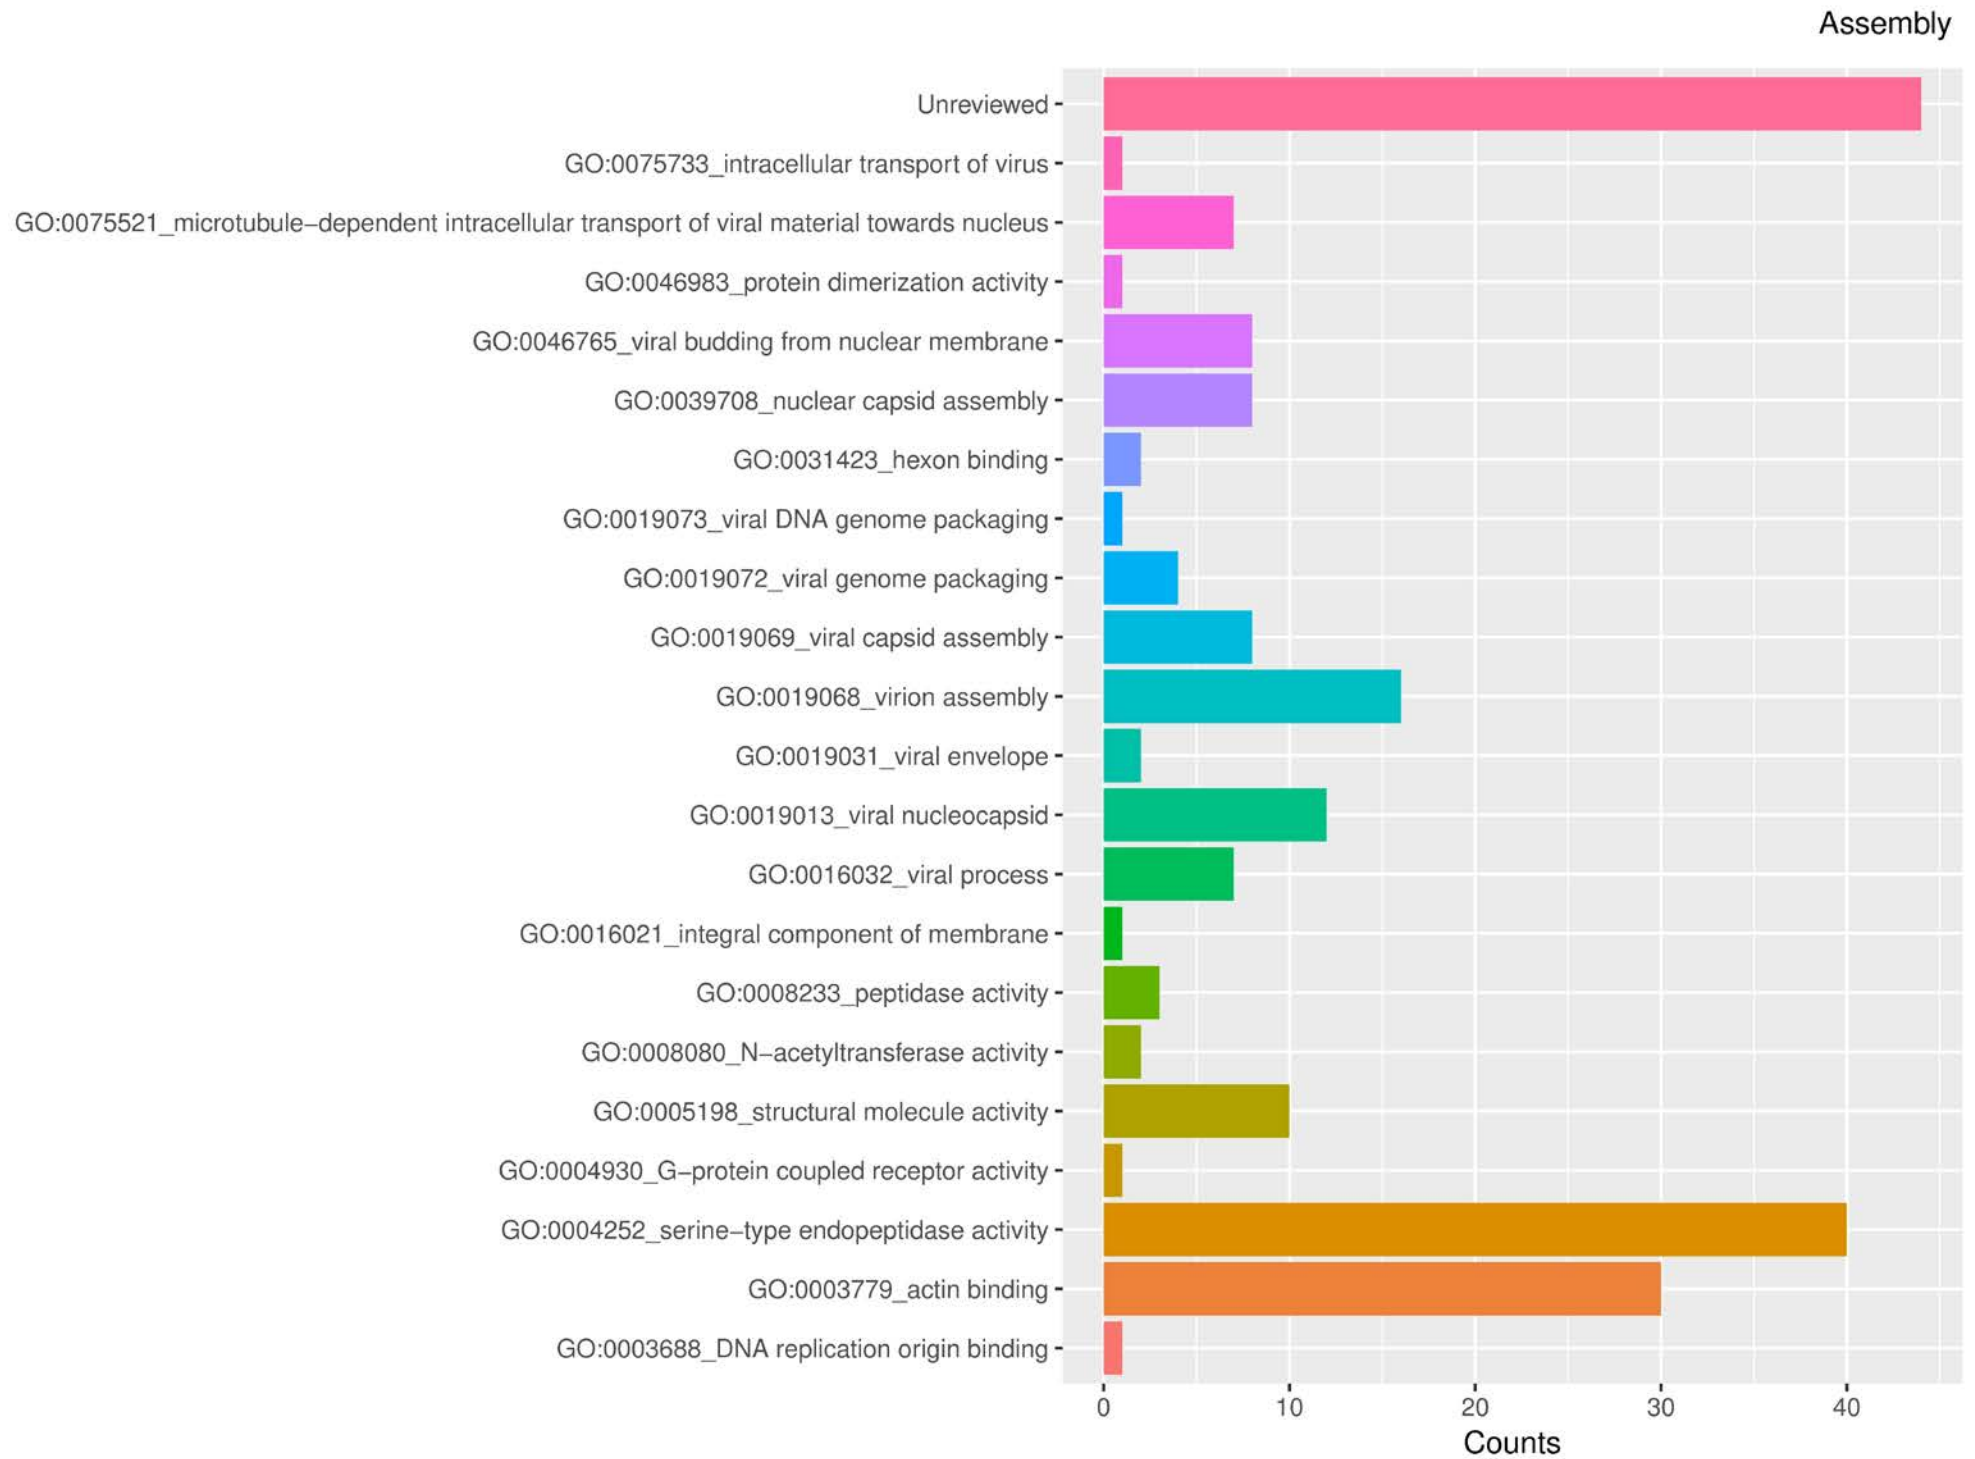

Supplementary Fig 5

Maturation

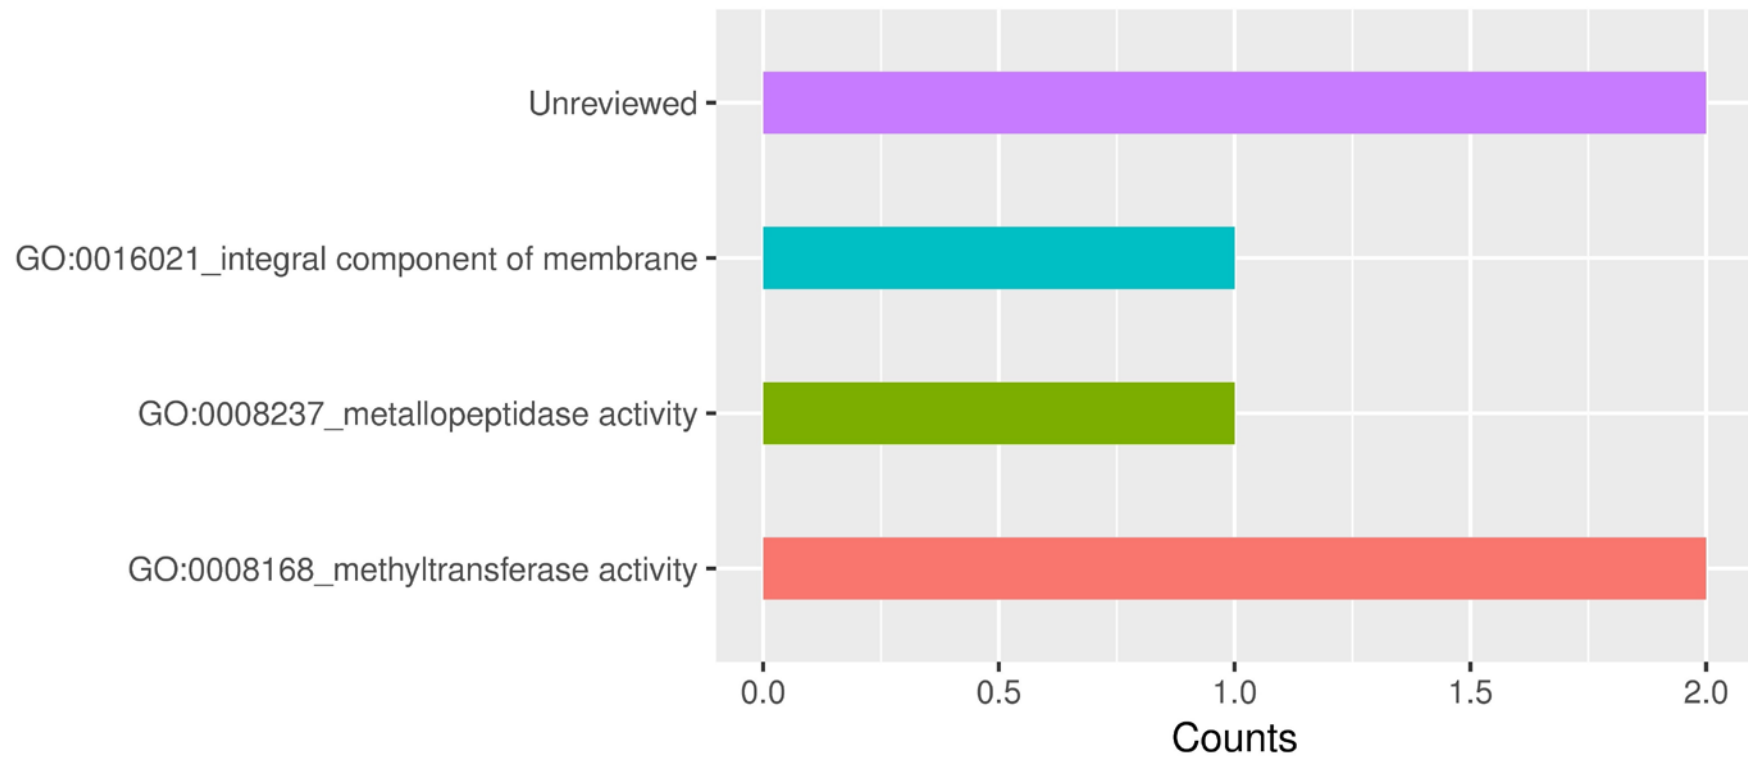

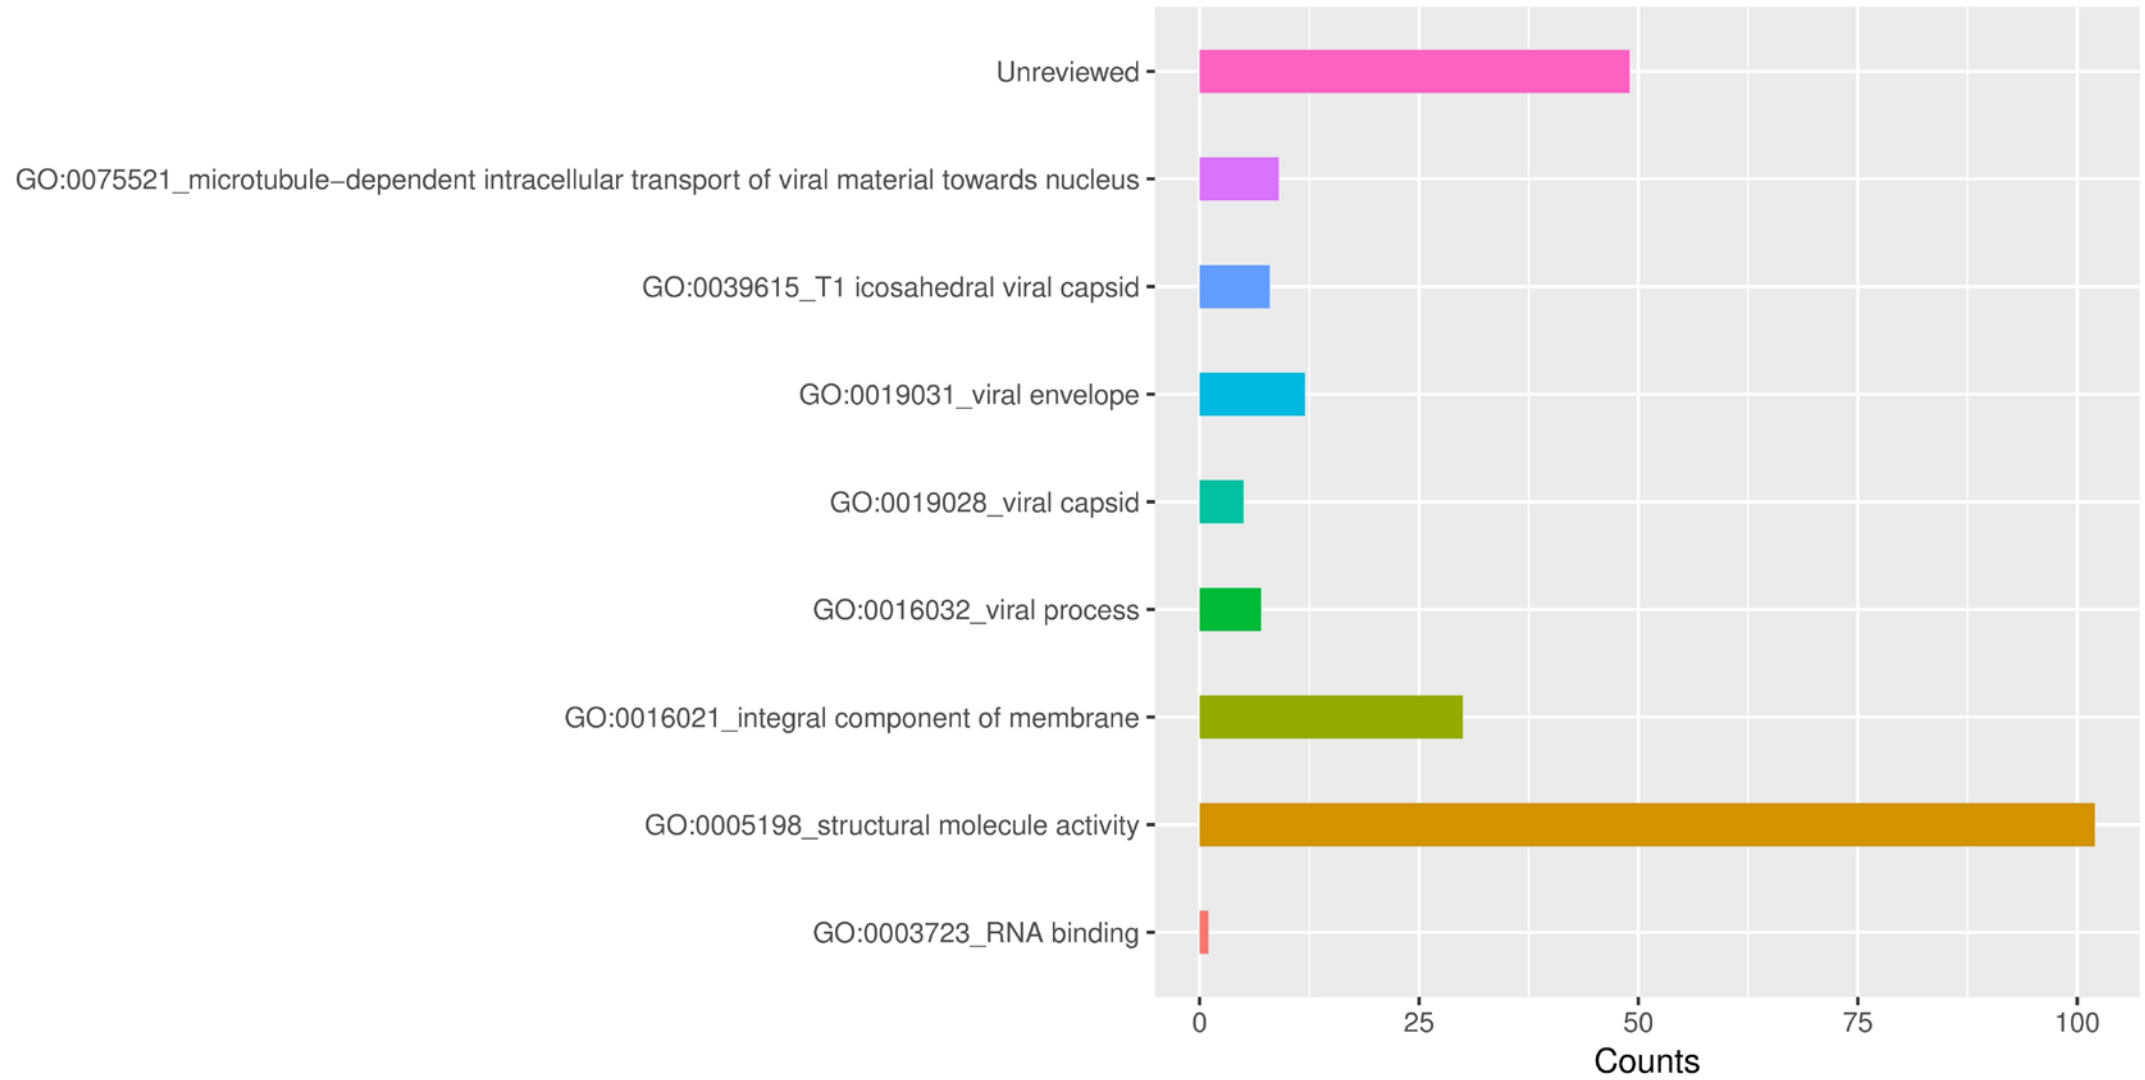

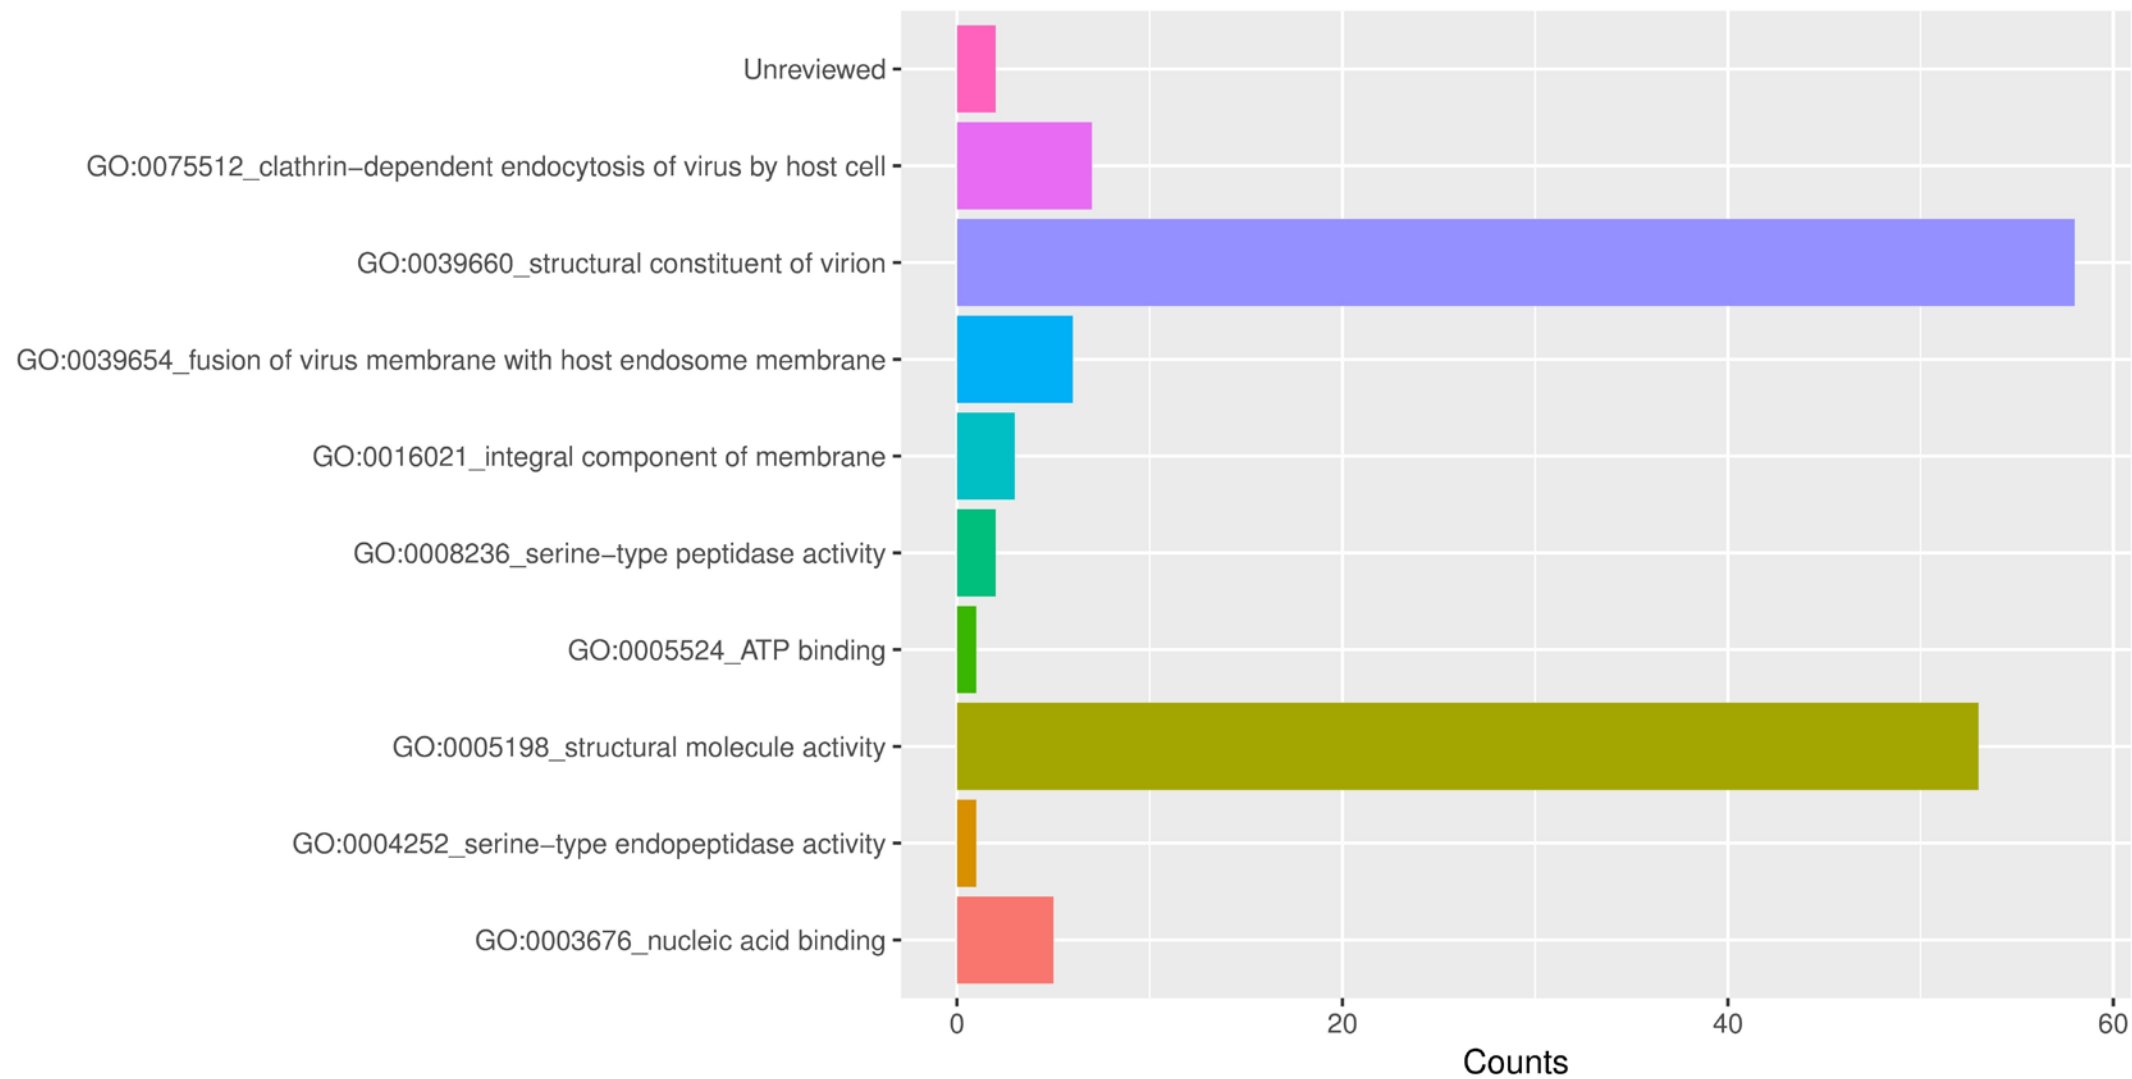

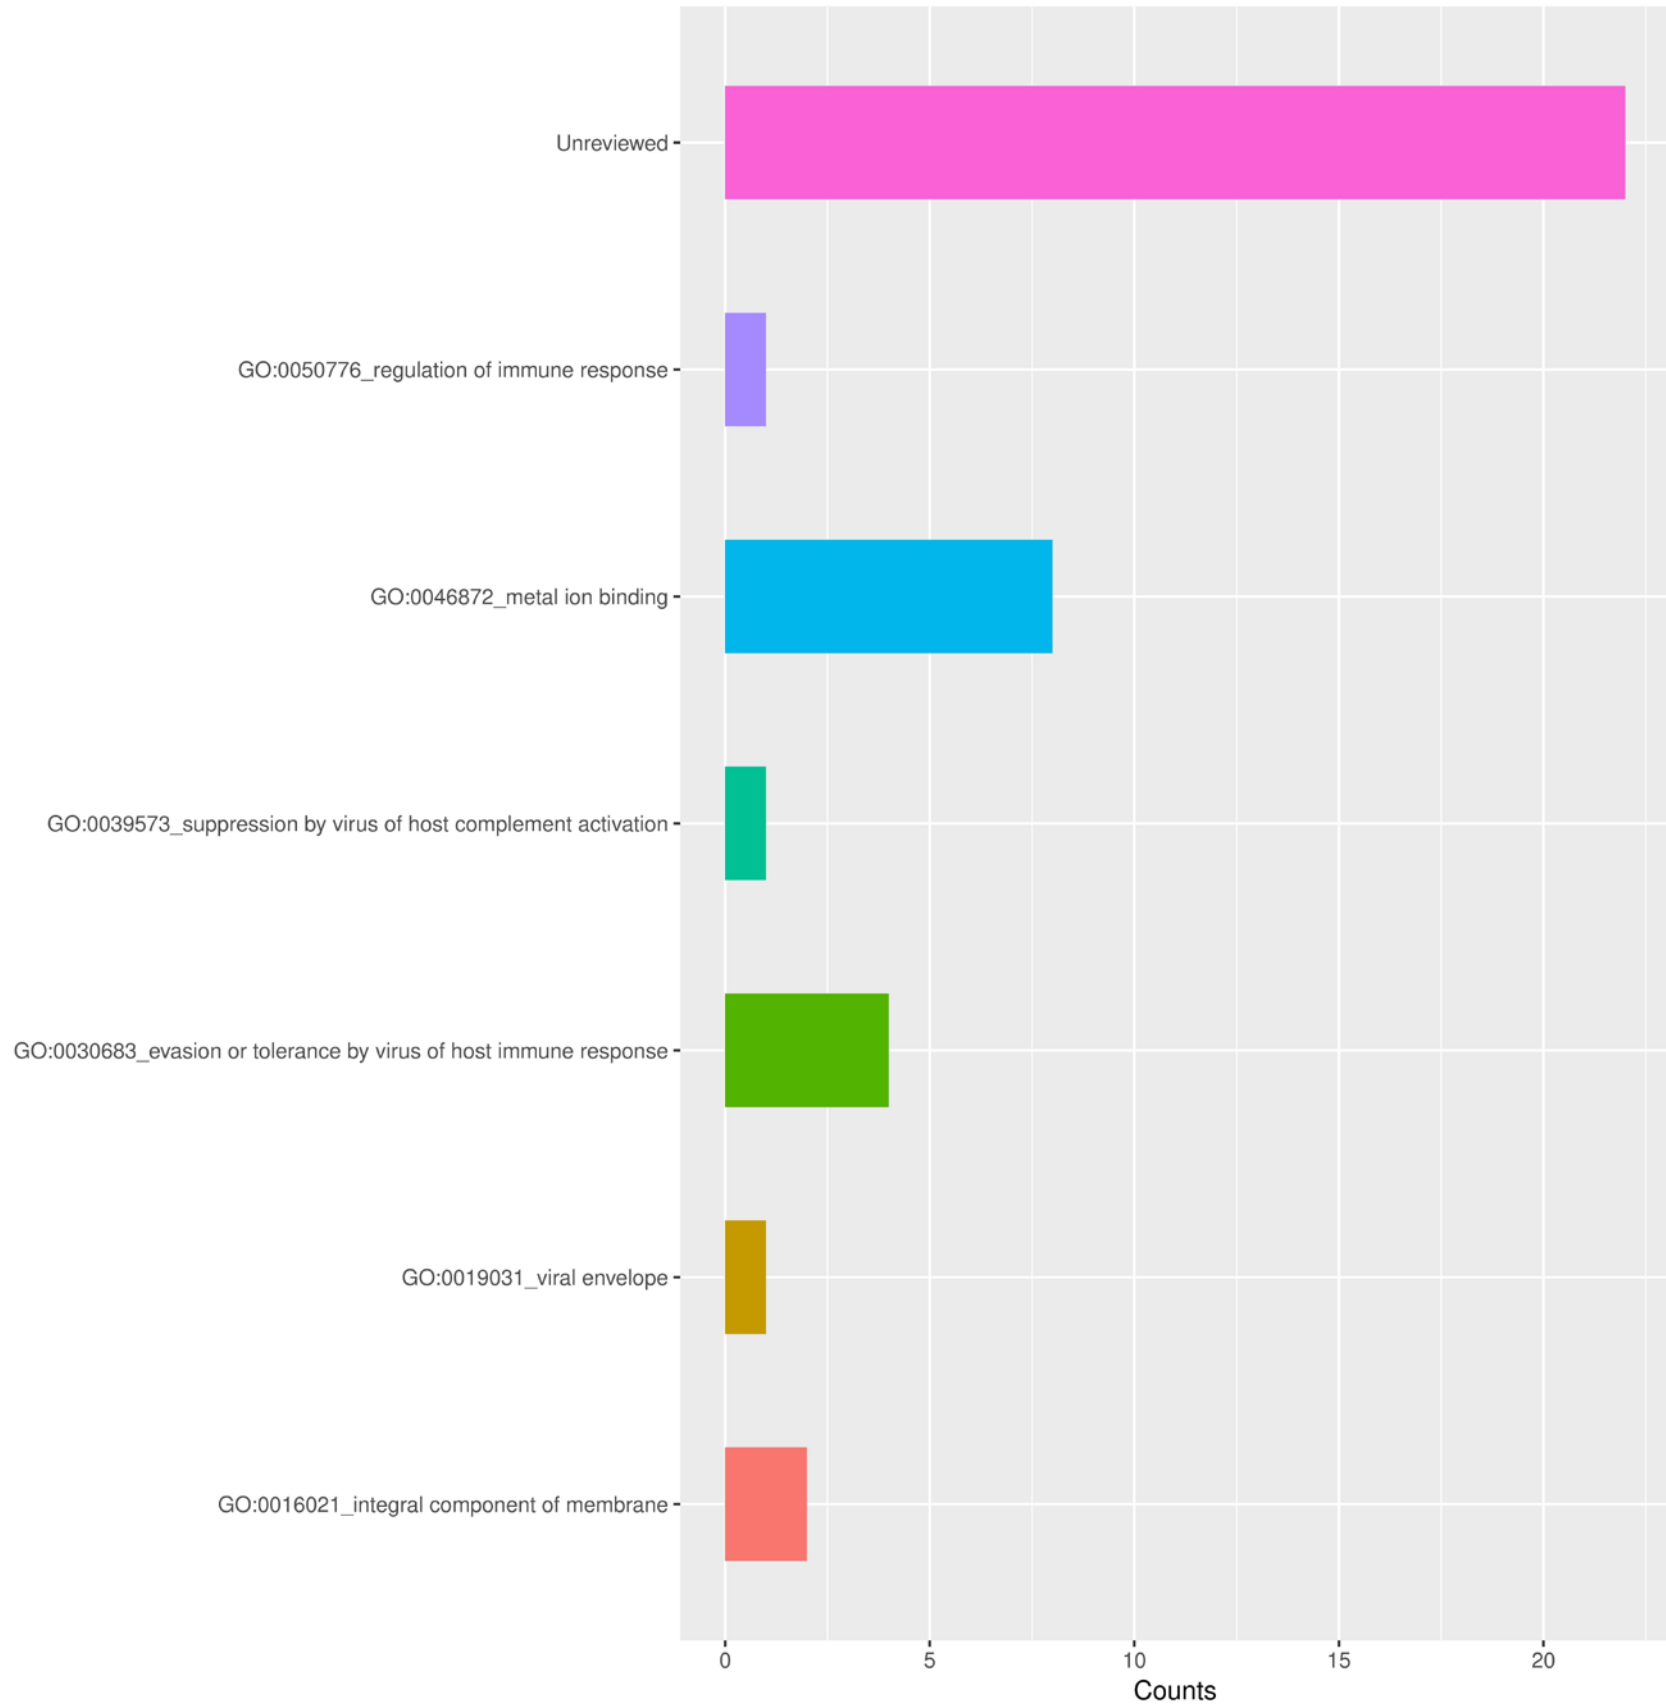

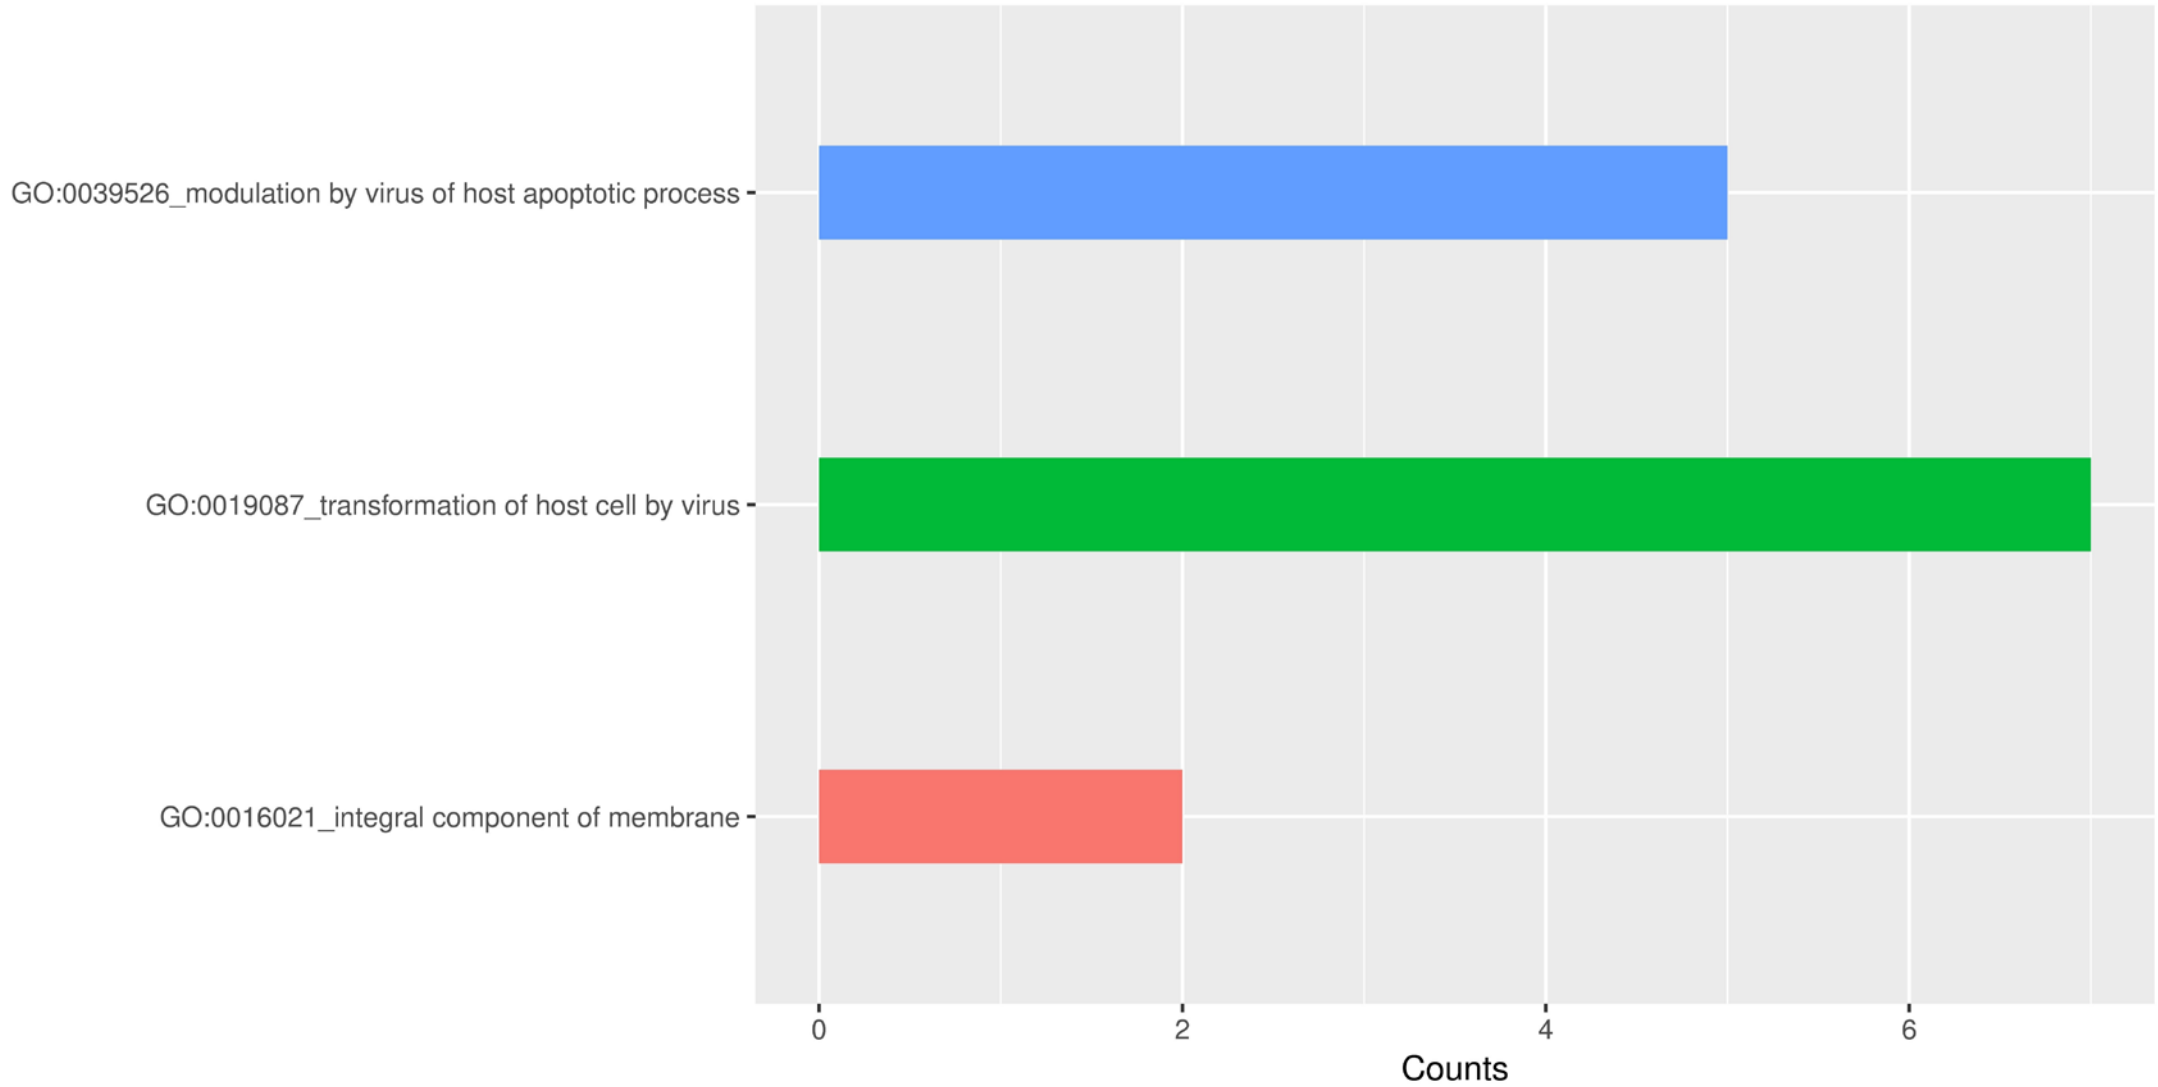



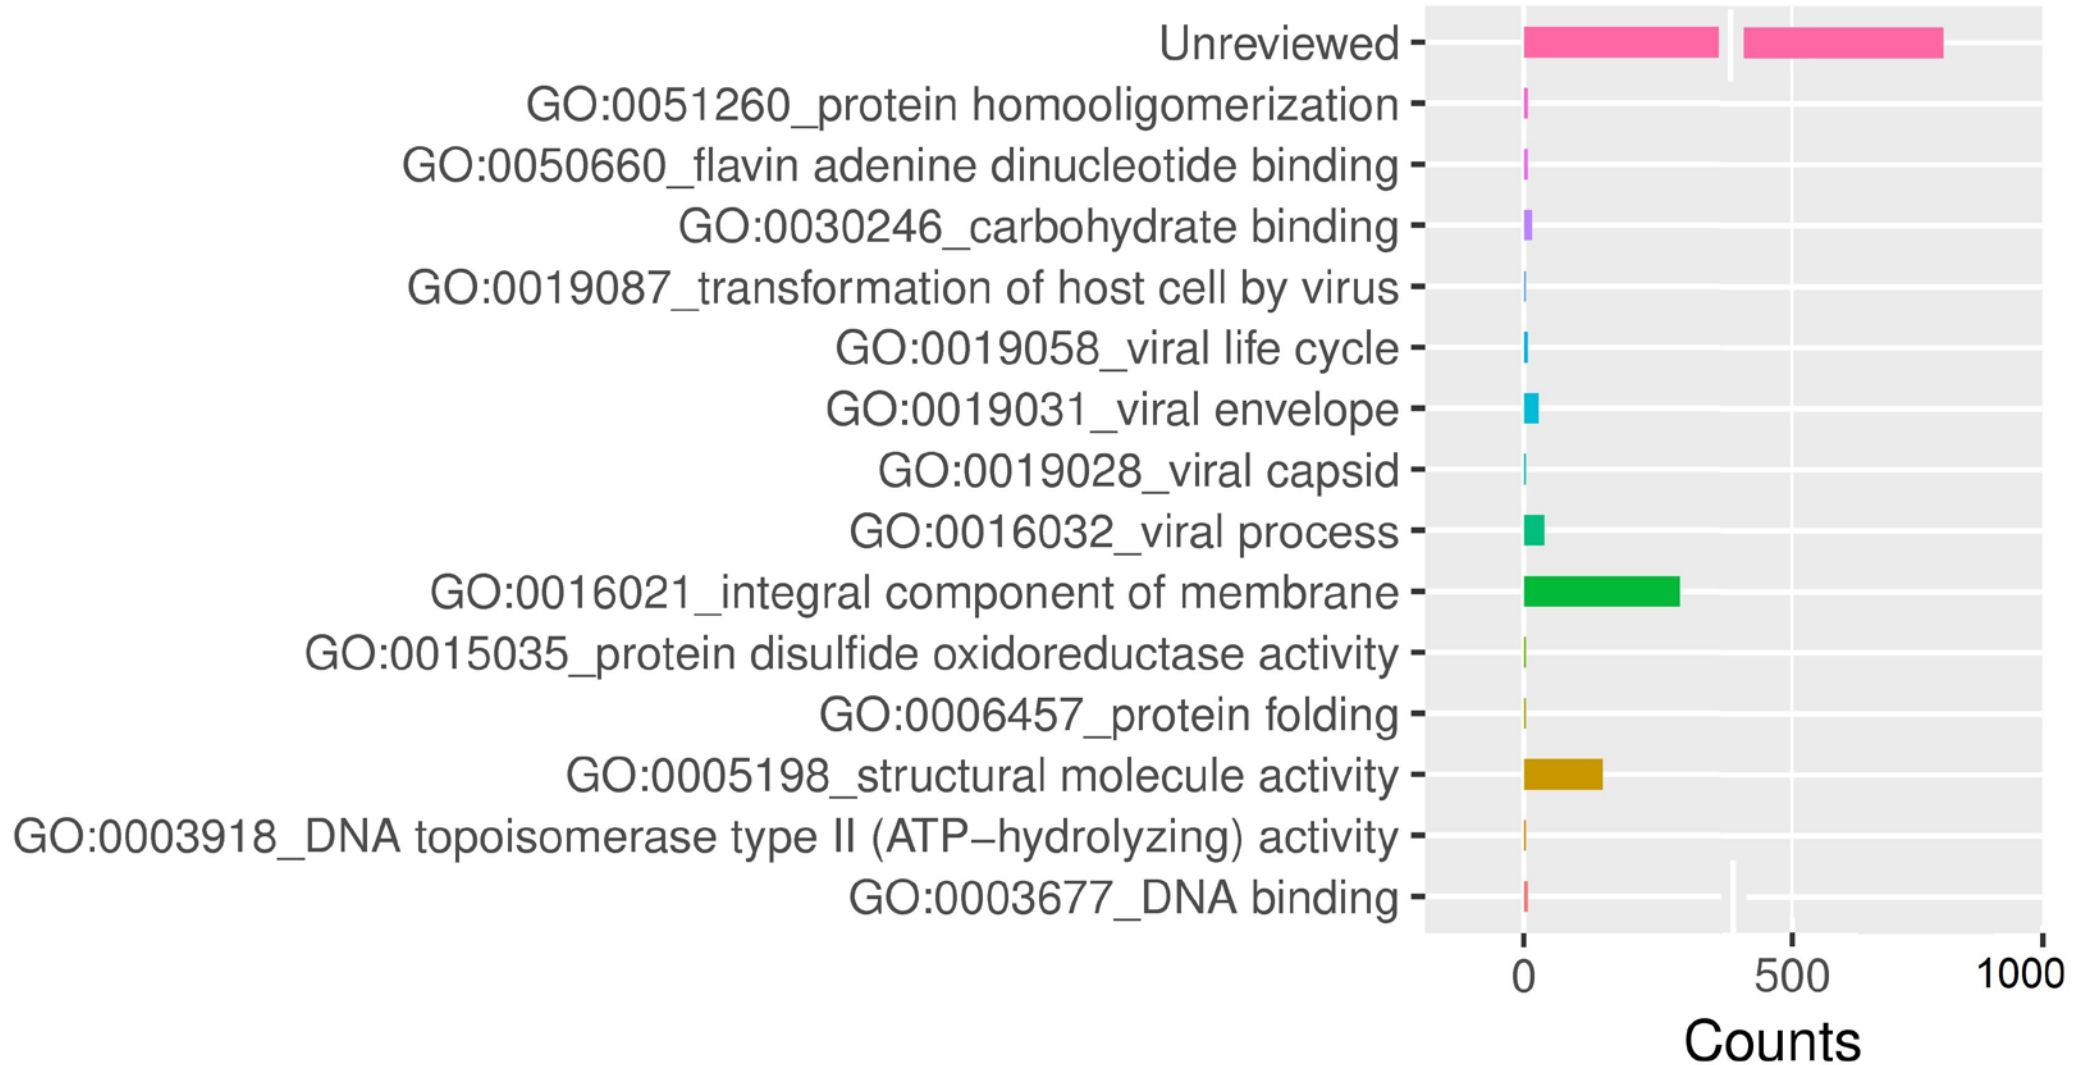

Supplement: 41598_2018_27256_MOESM9_ESM.pdf [file 41598_2018_27256_MOESM9_ESM.pdf]
